# Supplementary material for: Electrical transport properties of TiO2/MAPbI3 and SnO2/MAPbI3 heterojunction interfaces under high pressure
Source: Royal Society of Chemistry journal article supplement (doi:10.1039/d2ra08143a), 2023-01-01
Supplement: d2ra08143a1.pdf [file d2ra08143a1.pdf]

## Supplementary Information

### Electrical transport properties of TiO<sub>2</sub>/MAPbI<sub>3</sub> and SnO<sub>2</sub>/MAPbI<sub>3</sub> heterojunction interfaces under high pressure

*Yuqiang Li*<sup>a,d,\*</sup>, *Yuhong Li*<sup>a,d</sup>, *Qiang Zhang*<sup>b</sup>, *Xiaofeng Liu*<sup>c</sup>, *Yuanjing Li*<sup>a,d</sup>, *Ningru Xiao*<sup>e</sup>, *Pingfan Ning*<sup>d</sup>, *Jingjing Wang*<sup>a,d</sup>, *Jianxin Zhang*<sup>a,d</sup>, and *Hongwei Liu*<sup>a,d</sup>

<sup>a</sup>Tianjin Key Laboratory of Optoelectronic Detection Technology and Systems, School of Electronic and Information Engineering, Tiangong University, Tianjin 300387, China

<sup>b</sup>Key Laboratory of Smart Grid of Ministry of Education, School of Electrical and Information Engineering, Tianjin University, Tianjin 300072, China

<sup>c</sup>Tianjin San'an Optoelectronics Co., LTD., Tianjin 300384, China

<sup>d</sup>Engineering Research Center of High Power Solid State Lighting Application System of Ministry of Education, Tiangong University, Tianjin 300387, China

<sup>e</sup>School of Physical Science and Technology, Tiangong University, Tianjin 300387, China

**\*Corresponding authors:**

Email: [liyuqiang@tiangong.edu.cn](mailto:liyuqiang@tiangong.edu.cn)

## Supplementary Tables

**Table S1.** Atomic coordinate of  $\sqrt{2} \times \sqrt{2}$  supercell of (a) TiO<sub>2</sub>/MAPbI<sub>3</sub> and (b) SnO<sub>2</sub>/MAPbI<sub>3</sub> heterojunction interface by VASP.

| (a)              | x      | y      | z      | (b)              | x      | y      | z      |
|------------------|--------|--------|--------|------------------|--------|--------|--------|
| Ti <sub>1</sub>  | -0.001 | -0.035 | -0.002 | Sn <sub>1</sub>  | -0.016 | -0.002 | -0.002 |
| Ti <sub>2</sub>  | 0.000  | -0.034 | 0.038  | Sn <sub>2</sub>  | -0.016 | -0.001 | 0.037  |
| Ti <sub>3</sub>  | 0.000  | -0.034 | 0.079  | Sn <sub>3</sub>  | -0.016 | -0.001 | 0.077  |
| Ti <sub>4</sub>  | 0.000  | 0.034  | 0.119  | Sn <sub>4</sub>  | -0.017 | -0.001 | 0.117  |
| Ti <sub>5</sub>  | 0.000  | -0.032 | 0.159  | Sn <sub>5</sub>  | -0.018 | -0.001 | 0.158  |
| Ti <sub>6</sub>  | 0.001  | -0.028 | 0.200  | Sn <sub>6</sub>  | -0.015 | -0.001 | 0.197  |
| Ti <sub>7</sub>  | 0.500  | 0.466  | -0.001 | Sn <sub>7</sub>  | 0.484  | 0.499  | -0.003 |
| Ti <sub>8</sub>  | 0.500  | 0.466  | 0.038  | Sn <sub>8</sub>  | 0.484  | 0.499  | 0.037  |
| Ti <sub>9</sub>  | 0.500  | 0.466  | 0.078  | Sn <sub>9</sub>  | 0.483  | 0.499  | 0.077  |
| Ti <sub>10</sub> | 0.500  | 0.466  | 0.119  | Sn <sub>10</sub> | 0.482  | 0.499  | 0.117  |
| Ti <sub>11</sub> | 0.500  | 0.463  | 0.159  | Sn <sub>11</sub> | 0.481  | 0.499  | 0.157  |
| Ti <sub>12</sub> | 0.500  | 0.447  | 0.198  | Sn <sub>12</sub> | 0.475  | 0.500  | 0.196  |
| Ti <sub>13</sub> | 0.000  | 0.466  | 0.016  | Sn <sub>13</sub> | -0.016 | 0.499  | 0.014  |
| Ti <sub>14</sub> | 0.000  | 0.466  | 0.058  | Sn <sub>14</sub> | -0.016 | 0.499  | 0.056  |
| Ti <sub>15</sub> | 0.000  | 0.466  | 0.098  | Sn <sub>15</sub> | -0.017 | 0.499  | 0.097  |
| Ti <sub>16</sub> | 0.000  | 0.465  | 0.140  | Sn <sub>16</sub> | -0.019 | 0.499  | 0.138  |
| Ti <sub>17</sub> | 0.000  | 0.476  | 0.182  | Sn <sub>17</sub> | -0.022 | 0.499  | 0.180  |
| Ti <sub>18</sub> | 0.501  | -0.034 | 0.016  | Sn <sub>18</sub> | 0.484  | -0.001 | 0.014  |
| Ti <sub>19</sub> | 0.501  | -0.034 | 0.059  | Sn <sub>19</sub> | 0.484  | -0.001 | 0.056  |
| Ti <sub>20</sub> | 0.501  | -0.034 | 0.099  | Sn <sub>20</sub> | 0.483  | -0.001 | 0.097  |
| Ti <sub>21</sub> | 0.501  | -0.035 | 0.140  | Sn <sub>21</sub> | 0.483  | -0.001 | 0.138  |

|                        |               |               |               |                        |               |              |               |
|------------------------|---------------|---------------|---------------|------------------------|---------------|--------------|---------------|
| <b>Ti<sub>22</sub></b> | <b>0.501</b>  | <b>-0.042</b> | <b>0.181</b>  | <b>Sn<sub>22</sub></b> | <b>0.483</b>  | <b>0.000</b> | <b>0.180</b>  |
| <b>O<sub>1</sub></b>   | <b>0.000</b>  | <b>0.263</b>  | <b>-0.005</b> | <b>O<sub>1</sub></b>   | <b>-0.015</b> | <b>0.295</b> | <b>-0.007</b> |
| <b>O<sub>2</sub></b>   | <b>0.000</b>  | <b>0.274</b>  | <b>0.037</b>  | <b>O<sub>2</sub></b>   | <b>-0.016</b> | <b>0.307</b> | <b>0.035</b>  |
| <b>O<sub>3</sub></b>   | <b>0.000</b>  | <b>0.274</b>  | <b>0.078</b>  | <b>O<sub>3</sub></b>   | <b>-0.016</b> | <b>0.307</b> | <b>0.077</b>  |
| <b>O<sub>4</sub></b>   | <b>0.000</b>  | <b>0.274</b>  | <b>0.119</b>  | <b>O<sub>4</sub></b>   | <b>-0.017</b> | <b>0.307</b> | <b>0.117</b>  |
| <b>O<sub>5</sub></b>   | <b>0.000</b>  | <b>0.276</b>  | <b>0.160</b>  | <b>O<sub>5</sub></b>   | <b>-0.020</b> | <b>0.307</b> | <b>0.158</b>  |
| <b>O<sub>6</sub></b>   | <b>0.001</b>  | <b>0.274</b>  | <b>0.201</b>  | <b>O<sub>6</sub></b>   | <b>-0.022</b> | <b>0.299</b> | <b>0.200</b>  |
| <b>O<sub>7</sub></b>   | <b>0.500</b>  | <b>0.763</b>  | <b>-0.005</b> | <b>O<sub>7</sub></b>   | <b>0.483</b>  | <b>0.795</b> | <b>-0.007</b> |
| <b>O<sub>8</sub></b>   | <b>0.499</b>  | <b>0.774</b>  | <b>0.037</b>  | <b>O<sub>8</sub></b>   | <b>0.483</b>  | <b>0.807</b> | <b>0.035</b>  |
| <b>O<sub>9</sub></b>   | <b>0.499</b>  | <b>0.774</b>  | <b>0.078</b>  | <b>O<sub>9</sub></b>   | <b>0.483</b>  | <b>0.807</b> | <b>0.077</b>  |
| <b>O<sub>10</sub></b>  | <b>0.499</b>  | <b>0.774</b>  | <b>0.119</b>  | <b>O<sub>10</sub></b>  | <b>0.483</b>  | <b>0.807</b> | <b>0.117</b>  |
| <b>O<sub>11</sub></b>  | <b>0.499</b>  | <b>0.771</b>  | <b>0.160</b>  | <b>O<sub>11</sub></b>  | <b>0.483</b>  | <b>0.808</b> | <b>0.159</b>  |
| <b>O<sub>12</sub></b>  | <b>0.499</b>  | <b>0.743</b>  | <b>0.203</b>  | <b>O<sub>12</sub></b>  | <b>0.481</b>  | <b>0.794</b> | <b>0.201</b>  |
| <b>O<sub>13</sub></b>  | <b>-0.001</b> | <b>0.670</b>  | <b>-0.005</b> | <b>O<sub>13</sub></b>  | <b>-0.015</b> | <b>0.703</b> | <b>-0.007</b> |
| <b>O<sub>14</sub></b>  | <b>0.000</b>  | <b>0.658</b>  | <b>0.037</b>  | <b>O<sub>14</sub></b>  | <b>-0.016</b> | <b>0.691</b> | <b>0.035</b>  |
| <b>O<sub>15</sub></b>  | <b>0.000</b>  | <b>0.658</b>  | <b>0.078</b>  | <b>O<sub>15</sub></b>  | <b>-0.016</b> | <b>0.691</b> | <b>0.077</b>  |
| <b>O<sub>16</sub></b>  | <b>0.000</b>  | <b>0.658</b>  | <b>0.119</b>  | <b>O<sub>16</sub></b>  | <b>-0.017</b> | <b>0.691</b> | <b>0.117</b>  |
| <b>O<sub>17</sub></b>  | <b>0.000</b>  | <b>0.660</b>  | <b>0.160</b>  | <b>O<sub>17</sub></b>  | <b>-0.020</b> | <b>0.691</b> | <b>0.158</b>  |
| <b>O<sub>18</sub></b>  | <b>0.000</b>  | <b>0.671</b>  | <b>0.202</b>  | <b>O<sub>18</sub></b>  | <b>-0.022</b> | <b>0.699</b> | <b>0.200</b>  |
| <b>O<sub>19</sub></b>  | <b>0.500</b>  | <b>0.170</b>  | <b>-0.005</b> | <b>O<sub>19</sub></b>  | <b>0.485</b>  | <b>0.203</b> | <b>-0.007</b> |
| <b>O<sub>20</sub></b>  | <b>0.500</b>  | <b>0.158</b>  | <b>0.037</b>  | <b>O<sub>20</sub></b>  | <b>0.484</b>  | <b>0.190</b> | <b>0.035</b>  |
| <b>O<sub>21</sub></b>  | <b>0.500</b>  | <b>0.158</b>  | <b>0.078</b>  | <b>O<sub>21</sub></b>  | <b>0.484</b>  | <b>0.191</b> | <b>0.077</b>  |
| <b>O<sub>22</sub></b>  | <b>0.500</b>  | <b>0.158</b>  | <b>0.119</b>  | <b>O<sub>22</sub></b>  | <b>0.482</b>  | <b>0.191</b> | <b>0.117</b>  |
| <b>O<sub>23</sub></b>  | <b>0.500</b>  | <b>0.155</b>  | <b>0.160</b>  | <b>O<sub>23</sub></b>  | <b>0.482</b>  | <b>0.191</b> | <b>0.158</b>  |
| <b>O<sub>24</sub></b>  | <b>0.500</b>  | <b>0.153</b>  | <b>0.203</b>  | <b>O<sub>24</sub></b>  | <b>0.481</b>  | <b>0.206</b> | <b>0.201</b>  |
| <b>O<sub>25</sub></b>  | <b>0.696</b>  | <b>0.467</b>  | <b>0.018</b>  | <b>O<sub>25</sub></b>  | <b>0.680</b>  | <b>0.499</b> | <b>0.016</b>  |

|                       |               |               |              |                       |              |               |              |
|-----------------------|---------------|---------------|--------------|-----------------------|--------------|---------------|--------------|
| <b>O<sub>26</sub></b> | <b>0.693</b>  | <b>0.466</b>  | <b>0.058</b> | <b>O<sub>26</sub></b> | <b>0.677</b> | <b>0.499</b>  | <b>0.057</b> |
| <b>O<sub>27</sub></b> | <b>0.692</b>  | <b>0.466</b>  | <b>0.099</b> | <b>O<sub>27</sub></b> | <b>0.676</b> | <b>0.499</b>  | <b>0.097</b> |
| <b>O<sub>28</sub></b> | <b>0.693</b>  | <b>0.465</b>  | <b>0.139</b> | <b>O<sub>28</sub></b> | <b>0.675</b> | <b>0.499</b>  | <b>0.137</b> |
| <b>O<sub>29</sub></b> | <b>0.695</b>  | <b>0.464</b>  | <b>0.179</b> | <b>O<sub>29</sub></b> | <b>0.674</b> | <b>0.499</b>  | <b>0.177</b> |
| <b>O<sub>30</sub></b> | <b>0.196</b>  | <b>-0.033</b> | <b>0.018</b> | <b>O<sub>30</sub></b> | <b>0.181</b> | <b>-0.001</b> | <b>0.016</b> |
| <b>O<sub>31</sub></b> | <b>0.193</b>  | <b>-0.034</b> | <b>0.058</b> | <b>O<sub>31</sub></b> | <b>0.177</b> | <b>-0.001</b> | <b>0.057</b> |
| <b>O<sub>32</sub></b> | <b>0.192</b>  | <b>-0.034</b> | <b>0.099</b> | <b>O<sub>32</sub></b> | <b>0.176</b> | <b>-0.001</b> | <b>0.097</b> |
| <b>O<sub>33</sub></b> | <b>0.193</b>  | <b>-0.034</b> | <b>0.139</b> | <b>O<sub>33</sub></b> | <b>0.175</b> | <b>-0.001</b> | <b>0.138</b> |
| <b>O<sub>34</sub></b> | <b>0.196</b>  | <b>-0.038</b> | <b>0.180</b> | <b>O<sub>34</sub></b> | <b>0.179</b> | <b>0.000</b>  | <b>0.178</b> |
| <b>O<sub>35</sub></b> | <b>0.303</b>  | <b>0.466</b>  | <b>0.018</b> | <b>O<sub>35</sub></b> | <b>0.288</b> | <b>0.499</b>  | <b>0.016</b> |
| <b>O<sub>36</sub></b> | <b>0.306</b>  | <b>0.466</b>  | <b>0.058</b> | <b>O<sub>36</sub></b> | <b>0.291</b> | <b>0.499</b>  | <b>0.057</b> |
| <b>O<sub>37</sub></b> | <b>0.306</b>  | <b>0.465</b>  | <b>0.098</b> | <b>O<sub>37</sub></b> | <b>0.290</b> | <b>0.499</b>  | <b>0.097</b> |
| <b>O<sub>38</sub></b> | <b>0.306</b>  | <b>0.465</b>  | <b>0.139</b> | <b>O<sub>38</sub></b> | <b>0.288</b> | <b>0.499</b>  | <b>0.137</b> |
| <b>O<sub>39</sub></b> | <b>0.306</b>  | <b>0.464</b>  | <b>0.179</b> | <b>O<sub>39</sub></b> | <b>0.282</b> | <b>0.499</b>  | <b>0.177</b> |
| <b>O<sub>40</sub></b> | <b>0.802</b>  | <b>-0.034</b> | <b>0.018</b> | <b>O<sub>40</sub></b> | <b>0.787</b> | <b>-0.001</b> | <b>0.016</b> |
| <b>O<sub>41</sub></b> | <b>0.807</b>  | <b>-0.034</b> | <b>0.058</b> | <b>O<sub>41</sub></b> | <b>0.791</b> | <b>-0.001</b> | <b>0.057</b> |
| <b>O<sub>42</sub></b> | <b>0.807</b>  | <b>-0.034</b> | <b>0.099</b> | <b>O<sub>42</sub></b> | <b>0.791</b> | <b>-0.001</b> | <b>0.097</b> |
| <b>O<sub>43</sub></b> | <b>0.807</b>  | <b>-0.034</b> | <b>0.137</b> | <b>O<sub>43</sub></b> | <b>0.791</b> | <b>-0.001</b> | <b>0.138</b> |
| <b>O<sub>44</sub></b> | <b>0.804</b>  | <b>-0.037</b> | <b>0.180</b> | <b>O<sub>44</sub></b> | <b>0.787</b> | <b>0.000</b>  | <b>0.178</b> |
| <b>Pb<sub>1</sub></b> | <b>0.997</b>  | <b>0.018</b>  | <b>0.275</b> | <b>Pb<sub>1</sub></b> | <b>0.054</b> | <b>-0.006</b> | <b>0.269</b> |
| <b>Pb<sub>2</sub></b> | <b>0.003</b>  | <b>0.992</b>  | <b>0.350</b> | <b>Pb<sub>2</sub></b> | <b>0.023</b> | <b>-0.012</b> | <b>0.346</b> |
| <b>Pb<sub>3</sub></b> | <b>-0.021</b> | <b>0.971</b>  | <b>0.427</b> | <b>Pb<sub>3</sub></b> | <b>0.012</b> | <b>-0.014</b> | <b>0.425</b> |
| <b>I<sub>1</sub></b>  | <b>0.473</b>  | <b>0.038</b>  | <b>0.276</b> | <b>I<sub>1</sub></b>  | <b>0.568</b> | <b>-0.011</b> | <b>0.270</b> |
| <b>I<sub>2</sub></b>  | <b>0.475</b>  | <b>0.959</b>  | <b>0.350</b> | <b>I<sub>2</sub></b>  | <b>0.530</b> | <b>-0.011</b> | <b>0.347</b> |
| <b>I<sub>3</sub></b>  | <b>0.467</b>  | <b>0.972</b>  | <b>0.421</b> | <b>I<sub>3</sub></b>  | <b>0.515</b> | <b>-0.020</b> | <b>0.423</b> |
| <b>I<sub>4</sub></b>  | <b>0.950</b>  | <b>0.539</b>  | <b>0.275</b> | <b>I<sub>4</sub></b>  | <b>0.052</b> | <b>0.491</b>  | <b>0.273</b> |

|                       |               |              |              |                       |               |               |              |
|-----------------------|---------------|--------------|--------------|-----------------------|---------------|---------------|--------------|
| <b>I<sub>5</sub></b>  | <b>0.951</b>  | <b>0.499</b> | <b>0.349</b> | <b>I<sub>5</sub></b>  | <b>0.002</b>  | <b>0.489</b>  | <b>0.349</b> |
| <b>I<sub>6</sub></b>  | <b>0.949</b>  | <b>0.481</b> | <b>0.424</b> | <b>I<sub>6</sub></b>  | <b>-0.022</b> | <b>0.487</b>  | <b>0.423</b> |
| <b>I<sub>7</sub></b>  | <b>0.002</b>  | <b>0.042</b> | <b>0.234</b> | <b>I<sub>7</sub></b>  | <b>0.147</b>  | <b>-0.007</b> | <b>0.233</b> |
| <b>I<sub>8</sub></b>  | <b>-0.046</b> | <b>0.057</b> | <b>0.312</b> | <b>I<sub>8</sub></b>  | <b>0.066</b>  | <b>-0.010</b> | <b>0.310</b> |
| <b>I<sub>9</sub></b>  | <b>-0.041</b> | <b>0.013</b> | <b>0.388</b> | <b>I<sub>9</sub></b>  | <b>0.051</b>  | <b>-0.011</b> | <b>0.387</b> |
| <b>I<sub>10</sub></b> | <b>-0.016</b> | <b>0.920</b> | <b>0.465</b> | <b>I<sub>10</sub></b> | <b>0.068</b>  | <b>-0.012</b> | <b>0.464</b> |
| <b>C<sub>1</sub></b>  | <b>0.460</b>  | <b>0.587</b> | <b>0.241</b> | <b>C<sub>1</sub></b>  | <b>0.686</b>  | <b>0.488</b>  | <b>0.234</b> |
| <b>C<sub>2</sub></b>  | <b>0.439</b>  | <b>0.487</b> | <b>0.312</b> | <b>C<sub>2</sub></b>  | <b>0.553</b>  | <b>0.489</b>  | <b>0.307</b> |
| <b>C<sub>3</sub></b>  | <b>0.441</b>  | <b>0.454</b> | <b>0.386</b> | <b>C<sub>3</sub></b>  | <b>0.551</b>  | <b>0.486</b>  | <b>0.382</b> |
| <b>C<sub>4</sub></b>  | <b>0.468</b>  | <b>0.437</b> | <b>0.458</b> | <b>C<sub>4</sub></b>  | <b>0.527</b>  | <b>0.485</b>  | <b>0.458</b> |
| <b>N<sub>1</sub></b>  | <b>0.503</b>  | <b>0.793</b> | <b>0.234</b> | <b>N<sub>1</sub></b>  | <b>0.526</b>  | <b>0.489</b>  | <b>0.247</b> |
| <b>N<sub>2</sub></b>  | <b>0.645</b>  | <b>0.589</b> | <b>0.312</b> | <b>N<sub>2</sub></b>  | <b>0.465</b>  | <b>0.489</b>  | <b>0.324</b> |
| <b>N<sub>3</sub></b>  | <b>0.650</b>  | <b>0.548</b> | <b>0.386</b> | <b>N<sub>3</sub></b>  | <b>0.442</b>  | <b>0.489</b>  | <b>0.398</b> |
| <b>N<sub>4</sub></b>  | <b>0.480</b>  | <b>0.665</b> | <b>0.456</b> | <b>N<sub>4</sub></b>  | <b>0.297</b>  | <b>0.487</b>  | <b>0.457</b> |
| <b>H<sub>1</sub></b>  | <b>0.644</b>  | <b>0.849</b> | <b>0.238</b> | <b>H<sub>1</sub></b>  | <b>0.379</b>  | <b>0.490</b>  | <b>0.242</b> |
| <b>H<sub>2</sub></b>  | <b>0.736</b>  | <b>0.544</b> | <b>0.321</b> | <b>H<sub>2</sub></b>  | <b>0.305</b>  | <b>0.488</b>  | <b>0.324</b> |
| <b>H<sub>3</sub></b>  | <b>0.733</b>  | <b>0.501</b> | <b>0.396</b> | <b>H<sub>3</sub></b>  | <b>0.284</b>  | <b>0.483</b>  | <b>0.396</b> |
| <b>H<sub>4</sub></b>  | <b>0.614</b>  | <b>0.725</b> | <b>0.461</b> | <b>H<sub>4</sub></b>  | <b>0.243</b>  | <b>0.488</b>  | <b>0.446</b> |
| <b>H<sub>5</sub></b>  | <b>0.391</b>  | <b>0.897</b> | <b>0.238</b> | <b>H<sub>5</sub></b>  | <b>0.541</b>  | <b>0.617</b>  | <b>0.254</b> |
| <b>H<sub>6</sub></b>  | <b>0.635</b>  | <b>0.748</b> | <b>0.312</b> | <b>H<sub>6</sub></b>  | <b>0.509</b>  | <b>0.618</b>  | <b>0.330</b> |
| <b>H<sub>7</sub></b>  | <b>0.645</b>  | <b>0.708</b> | <b>0.387</b> | <b>H<sub>7</sub></b>  | <b>0.478</b>  | <b>0.613</b>  | <b>0.405</b> |
| <b>H<sub>8</sub></b>  | <b>0.352</b>  | <b>0.737</b> | <b>0.461</b> | <b>H<sub>8</sub></b>  | <b>0.235</b>  | <b>0.620</b>  | <b>0.463</b> |
| <b>H<sub>9</sub></b>  | <b>0.504</b>  | <b>0.787</b> | <b>0.221</b> | <b>H<sub>9</sub></b>  | <b>0.538</b>  | <b>0.358</b>  | <b>0.254</b> |
| <b>H<sub>10</sub></b> | <b>0.725</b>  | <b>0.555</b> | <b>0.301</b> | <b>H<sub>10</sub></b> | <b>0.509</b>  | <b>0.359</b>  | <b>0.330</b> |
| <b>H<sub>11</sub></b> | <b>0.736</b>  | <b>0.512</b> | <b>0.376</b> | <b>H<sub>11</sub></b> | <b>0.479</b>  | <b>0.354</b>  | <b>0.404</b> |
| <b>H<sub>12</sub></b> | <b>0.481</b>  | <b>0.715</b> | <b>0.444</b> | <b>H<sub>12</sub></b> | <b>0.233</b>  | <b>0.355</b>  | <b>0.463</b> |

|                       |              |              |              |                       |              |              |              |
|-----------------------|--------------|--------------|--------------|-----------------------|--------------|--------------|--------------|
| <b>H<sub>15</sub></b> | <b>0.361</b> | <b>0.510</b> | <b>0.375</b> | <b>H<sub>15</sub></b> | <b>0.505</b> | <b>0.625</b> | <b>0.375</b> |
| <b>H<sub>16</sub></b> | <b>0.326</b> | <b>0.384</b> | <b>0.452</b> | <b>H<sub>16</sub></b> | <b>0.586</b> | <b>0.624</b> | <b>0.452</b> |
| <b>H<sub>17</sub></b> | <b>0.453</b> | <b>0.597</b> | <b>0.255</b> | <b>H<sub>17</sub></b> | <b>0.664</b> | <b>0.350</b> | <b>0.226</b> |
| <b>H<sub>18</sub></b> | <b>0.363</b> | <b>0.528</b> | <b>0.324</b> | <b>H<sub>18</sub></b> | <b>0.501</b> | <b>0.350</b> | <b>0.301</b> |
| <b>H<sub>19</sub></b> | <b>0.356</b> | <b>0.497</b> | <b>0.397</b> | <b>H<sub>19</sub></b> | <b>0.507</b> | <b>0.348</b> | <b>0.375</b> |
| <b>H<sub>20</sub></b> | <b>0.466</b> | <b>0.394</b> | <b>0.471</b> | <b>H<sub>20</sub></b> | <b>0.583</b> | <b>0.348</b> | <b>0.452</b> |
| <b>H<sub>21</sub></b> | <b>0.583</b> | <b>0.480</b> | <b>0.238</b> | <b>H<sub>21</sub></b> | <b>0.838</b> | <b>0.482</b> | <b>0.239</b> |
| <b>H<sub>22</sub></b> | <b>0.461</b> | <b>0.321</b> | <b>0.311</b> | <b>H<sub>22</sub></b> | <b>0.721</b> | <b>0.489</b> | <b>0.308</b> |
| <b>H<sub>23</sub></b> | <b>0.458</b> | <b>0.286</b> | <b>0.385</b> | <b>H<sub>23</sub></b> | <b>0.717</b> | <b>0.487</b> | <b>0.384</b> |
| <b>H<sub>24</sub></b> | <b>0.603</b> | <b>0.375</b> | <b>0.455</b> | <b>H<sub>24</sub></b> | <b>0.573</b> | <b>0.482</b> | <b>0.469</b> |

**Table S2.** Atomic coordinate of  $\sqrt{2} \times \sqrt{2}$  supercell of (a) TiO<sub>2</sub>/MAPbI<sub>3</sub> and (b) SnO<sub>2</sub>/MAPbI<sub>3</sub> heterojunction interfaces by MS (Materials Studio).

| <b>(a)</b>            | <b>x</b>      | <b>y</b>      | <b>z</b>      | <b>(b)</b>            | <b>x</b>      | <b>y</b>      | <b>z</b>      |
|-----------------------|---------------|---------------|---------------|-----------------------|---------------|---------------|---------------|
| <b>Ti<sub>1</sub></b> | <b>-0.001</b> | <b>-0.035</b> | <b>-0.002</b> | <b>Sn<sub>1</sub></b> | <b>-0.015</b> | <b>-0.002</b> | <b>-0.002</b> |
| <b>Ti<sub>2</sub></b> | <b>0.000</b>  | <b>-0.034</b> | <b>0.038</b>  | <b>Sn<sub>2</sub></b> | <b>-0.015</b> | <b>-0.001</b> | <b>0.036</b>  |
| <b>Ti<sub>3</sub></b> | <b>0.000</b>  | <b>-0.034</b> | <b>0.079</b>  | <b>Sn<sub>3</sub></b> | <b>-0.015</b> | <b>-0.001</b> | <b>0.078</b>  |
| <b>Ti<sub>4</sub></b> | <b>0.000</b>  | <b>0.034</b>  | <b>0.119</b>  | <b>Sn<sub>4</sub></b> | <b>-0.017</b> | <b>-0.001</b> | <b>0.117</b>  |
| <b>Ti<sub>5</sub></b> | <b>0.000</b>  | <b>-0.032</b> | <b>0.159</b>  | <b>Sn<sub>5</sub></b> | <b>-0.018</b> | <b>-0.001</b> | <b>0.158</b>  |
| <b>Ti<sub>6</sub></b> | <b>0.001</b>  | <b>-0.028</b> | <b>0.200</b>  | <b>Sn<sub>6</sub></b> | <b>-0.015</b> | <b>-0.001</b> | <b>0.197</b>  |
| <b>Ti<sub>7</sub></b> | <b>0.501</b>  | <b>0.467</b>  | <b>-0.001</b> | <b>Sn<sub>7</sub></b> | <b>0.484</b>  | <b>0.498</b>  | <b>-0.003</b> |

|                        |              |               |               |                        |               |               |               |
|------------------------|--------------|---------------|---------------|------------------------|---------------|---------------|---------------|
| <b>Ti<sub>8</sub></b>  | <b>0.501</b> | <b>0.467</b>  | <b>0.038</b>  | <b>Sn<sub>8</sub></b>  | <b>0.484</b>  | <b>0.498</b>  | <b>0.037</b>  |
| <b>Ti<sub>9</sub></b>  | <b>0.501</b> | <b>0.467</b>  | <b>0.078</b>  | <b>Sn<sub>9</sub></b>  | <b>0.483</b>  | <b>0.498</b>  | <b>0.077</b>  |
| <b>Ti<sub>10</sub></b> | <b>0.500</b> | <b>0.466</b>  | <b>0.119</b>  | <b>Sn<sub>10</sub></b> | <b>0.482</b>  | <b>0.499</b>  | <b>0.117</b>  |
| <b>Ti<sub>11</sub></b> | <b>0.500</b> | <b>0.463</b>  | <b>0.159</b>  | <b>Sn<sub>11</sub></b> | <b>0.481</b>  | <b>0.499</b>  | <b>0.157</b>  |
| <b>Ti<sub>12</sub></b> | <b>0.500</b> | <b>0.447</b>  | <b>0.198</b>  | <b>Sn<sub>12</sub></b> | <b>0.475</b>  | <b>0.500</b>  | <b>0.196</b>  |
| <b>Ti<sub>13</sub></b> | <b>0.000</b> | <b>0.466</b>  | <b>0.016</b>  | <b>Sn<sub>13</sub></b> | <b>-0.016</b> | <b>0.499</b>  | <b>0.014</b>  |
| <b>Ti<sub>14</sub></b> | <b>0.000</b> | <b>0.466</b>  | <b>0.058</b>  | <b>Sn<sub>14</sub></b> | <b>-0.016</b> | <b>0.499</b>  | <b>0.056</b>  |
| <b>Ti<sub>15</sub></b> | <b>0.000</b> | <b>0.466</b>  | <b>0.098</b>  | <b>Sn<sub>15</sub></b> | <b>-0.017</b> | <b>0.499</b>  | <b>0.097</b>  |
| <b>Ti<sub>16</sub></b> | <b>0.000</b> | <b>0.465</b>  | <b>0.140</b>  | <b>Sn<sub>16</sub></b> | <b>-0.019</b> | <b>0.499</b>  | <b>0.138</b>  |
| <b>Ti<sub>17</sub></b> | <b>0.000</b> | <b>0.476</b>  | <b>0.182</b>  | <b>Sn<sub>17</sub></b> | <b>-0.022</b> | <b>0.499</b>  | <b>0.180</b>  |
| <b>Ti<sub>18</sub></b> | <b>0.500</b> | <b>-0.034</b> | <b>0.016</b>  | <b>Sn<sub>18</sub></b> | <b>0.485</b>  | <b>-0.001</b> | <b>0.014</b>  |
| <b>Ti<sub>19</sub></b> | <b>0.500</b> | <b>-0.034</b> | <b>0.059</b>  | <b>Sn<sub>19</sub></b> | <b>0.485</b>  | <b>-0.001</b> | <b>0.056</b>  |
| <b>Ti<sub>20</sub></b> | <b>0.500</b> | <b>-0.034</b> | <b>0.099</b>  | <b>Sn<sub>20</sub></b> | <b>0.483</b>  | <b>-0.001</b> | <b>0.097</b>  |
| <b>Ti<sub>21</sub></b> | <b>0.500</b> | <b>-0.035</b> | <b>0.140</b>  | <b>Sn<sub>21</sub></b> | <b>0.483</b>  | <b>-0.001</b> | <b>0.138</b>  |
| <b>Ti<sub>22</sub></b> | <b>0.500</b> | <b>-0.042</b> | <b>0.181</b>  | <b>Sn<sub>22</sub></b> | <b>0.483</b>  | <b>0.000</b>  | <b>0.180</b>  |
| <b>O<sub>1</sub></b>   | <b>0.000</b> | <b>0.263</b>  | <b>-0.005</b> | <b>O<sub>1</sub></b>   | <b>-0.015</b> | <b>0.295</b>  | <b>-0.007</b> |
| <b>O<sub>2</sub></b>   | <b>0.000</b> | <b>0.274</b>  | <b>0.037</b>  | <b>O<sub>2</sub></b>   | <b>-0.016</b> | <b>0.307</b>  | <b>0.035</b>  |
| <b>O<sub>3</sub></b>   | <b>0.000</b> | <b>0.274</b>  | <b>0.078</b>  | <b>O<sub>3</sub></b>   | <b>-0.016</b> | <b>0.307</b>  | <b>0.077</b>  |
| <b>O<sub>4</sub></b>   | <b>0.000</b> | <b>0.274</b>  | <b>0.119</b>  | <b>O<sub>4</sub></b>   | <b>-0.017</b> | <b>0.307</b>  | <b>0.117</b>  |
| <b>O<sub>5</sub></b>   | <b>0.000</b> | <b>0.276</b>  | <b>0.160</b>  | <b>O<sub>5</sub></b>   | <b>-0.020</b> | <b>0.307</b>  | <b>0.158</b>  |
| <b>O<sub>6</sub></b>   | <b>0.001</b> | <b>0.274</b>  | <b>0.201</b>  | <b>O<sub>6</sub></b>   | <b>-0.022</b> | <b>0.299</b>  | <b>0.200</b>  |
| <b>O<sub>7</sub></b>   | <b>0.500</b> | <b>0.763</b>  | <b>-0.005</b> | <b>O<sub>7</sub></b>   | <b>0.483</b>  | <b>0.795</b>  | <b>-0.007</b> |
| <b>O<sub>8</sub></b>   | <b>0.499</b> | <b>0.774</b>  | <b>0.037</b>  | <b>O<sub>8</sub></b>   | <b>0.483</b>  | <b>0.807</b>  | <b>0.035</b>  |
| <b>O<sub>9</sub></b>   | <b>0.499</b> | <b>0.774</b>  | <b>0.078</b>  | <b>O<sub>9</sub></b>   | <b>0.483</b>  | <b>0.807</b>  | <b>0.077</b>  |
| <b>O<sub>10</sub></b>  | <b>0.499</b> | <b>0.774</b>  | <b>0.119</b>  | <b>O<sub>10</sub></b>  | <b>0.483</b>  | <b>0.807</b>  | <b>0.117</b>  |
| <b>O<sub>11</sub></b>  | <b>0.499</b> | <b>0.771</b>  | <b>0.160</b>  | <b>O<sub>11</sub></b>  | <b>0.483</b>  | <b>0.808</b>  | <b>0.159</b>  |

|                       |               |               |               |                       |               |               |               |
|-----------------------|---------------|---------------|---------------|-----------------------|---------------|---------------|---------------|
| <b>O<sub>12</sub></b> | <b>0.499</b>  | <b>0.743</b>  | <b>0.203</b>  | <b>O<sub>12</sub></b> | <b>0.483</b>  | <b>0.794</b>  | <b>0.201</b>  |
| <b>O<sub>13</sub></b> | <b>-0.001</b> | <b>0.670</b>  | <b>-0.005</b> | <b>O<sub>13</sub></b> | <b>-0.015</b> | <b>0.703</b>  | <b>-0.007</b> |
| <b>O<sub>14</sub></b> | <b>0.000</b>  | <b>0.658</b>  | <b>0.037</b>  | <b>O<sub>14</sub></b> | <b>-0.016</b> | <b>0.691</b>  | <b>0.035</b>  |
| <b>O<sub>15</sub></b> | <b>0.000</b>  | <b>0.658</b>  | <b>0.078</b>  | <b>O<sub>15</sub></b> | <b>-0.016</b> | <b>0.691</b>  | <b>0.077</b>  |
| <b>O<sub>16</sub></b> | <b>0.000</b>  | <b>0.658</b>  | <b>0.119</b>  | <b>O<sub>16</sub></b> | <b>-0.017</b> | <b>0.691</b>  | <b>0.117</b>  |
| <b>O<sub>17</sub></b> | <b>0.000</b>  | <b>0.660</b>  | <b>0.160</b>  | <b>O<sub>17</sub></b> | <b>-0.020</b> | <b>0.691</b>  | <b>0.158</b>  |
| <b>O<sub>18</sub></b> | <b>0.000</b>  | <b>0.671</b>  | <b>0.202</b>  | <b>O<sub>18</sub></b> | <b>-0.022</b> | <b>0.699</b>  | <b>0.200</b>  |
| <b>O<sub>19</sub></b> | <b>0.500</b>  | <b>0.170</b>  | <b>-0.005</b> | <b>O<sub>19</sub></b> | <b>0.485</b>  | <b>0.203</b>  | <b>-0.007</b> |
| <b>O<sub>20</sub></b> | <b>0.500</b>  | <b>0.158</b>  | <b>0.037</b>  | <b>O<sub>20</sub></b> | <b>0.484</b>  | <b>0.190</b>  | <b>0.035</b>  |
| <b>O<sub>21</sub></b> | <b>0.500</b>  | <b>0.158</b>  | <b>0.078</b>  | <b>O<sub>21</sub></b> | <b>0.484</b>  | <b>0.191</b>  | <b>0.077</b>  |
| <b>O<sub>22</sub></b> | <b>0.500</b>  | <b>0.158</b>  | <b>0.119</b>  | <b>O<sub>22</sub></b> | <b>0.482</b>  | <b>0.191</b>  | <b>0.117</b>  |
| <b>O<sub>23</sub></b> | <b>0.500</b>  | <b>0.155</b>  | <b>0.160</b>  | <b>O<sub>23</sub></b> | <b>0.482</b>  | <b>0.191</b>  | <b>0.158</b>  |
| <b>O<sub>24</sub></b> | <b>0.500</b>  | <b>0.153</b>  | <b>0.203</b>  | <b>O<sub>24</sub></b> | <b>0.481</b>  | <b>0.206</b>  | <b>0.201</b>  |
| <b>O<sub>25</sub></b> | <b>0.696</b>  | <b>0.467</b>  | <b>0.018</b>  | <b>O<sub>25</sub></b> | <b>0.680</b>  | <b>0.498</b>  | <b>0.016</b>  |
| <b>O<sub>26</sub></b> | <b>0.693</b>  | <b>0.466</b>  | <b>0.058</b>  | <b>O<sub>26</sub></b> | <b>0.677</b>  | <b>0.498</b>  | <b>0.057</b>  |
| <b>O<sub>27</sub></b> | <b>0.692</b>  | <b>0.466</b>  | <b>0.099</b>  | <b>O<sub>27</sub></b> | <b>0.676</b>  | <b>0.498</b>  | <b>0.097</b>  |
| <b>O<sub>28</sub></b> | <b>0.693</b>  | <b>0.465</b>  | <b>0.139</b>  | <b>O<sub>28</sub></b> | <b>0.675</b>  | <b>0.498</b>  | <b>0.137</b>  |
| <b>O<sub>29</sub></b> | <b>0.695</b>  | <b>0.464</b>  | <b>0.179</b>  | <b>O<sub>29</sub></b> | <b>0.675</b>  | <b>0.498</b>  | <b>0.177</b>  |
| <b>O<sub>30</sub></b> | <b>0.196</b>  | <b>-0.033</b> | <b>0.018</b>  | <b>O<sub>30</sub></b> | <b>0.181</b>  | <b>-0.001</b> | <b>0.016</b>  |
| <b>O<sub>31</sub></b> | <b>0.193</b>  | <b>-0.034</b> | <b>0.058</b>  | <b>O<sub>31</sub></b> | <b>0.177</b>  | <b>-0.001</b> | <b>0.057</b>  |
| <b>O<sub>32</sub></b> | <b>0.192</b>  | <b>-0.034</b> | <b>0.099</b>  | <b>O<sub>32</sub></b> | <b>0.176</b>  | <b>-0.001</b> | <b>0.097</b>  |
| <b>O<sub>33</sub></b> | <b>0.193</b>  | <b>-0.034</b> | <b>0.139</b>  | <b>O<sub>33</sub></b> | <b>0.175</b>  | <b>-0.001</b> | <b>0.138</b>  |
| <b>O<sub>34</sub></b> | <b>0.196</b>  | <b>-0.038</b> | <b>0.180</b>  | <b>O<sub>34</sub></b> | <b>0.179</b>  | <b>0.000</b>  | <b>0.178</b>  |
| <b>O<sub>35</sub></b> | <b>0.303</b>  | <b>0.466</b>  | <b>0.018</b>  | <b>O<sub>35</sub></b> | <b>0.288</b>  | <b>0.498</b>  | <b>0.016</b>  |
| <b>O<sub>36</sub></b> | <b>0.306</b>  | <b>0.466</b>  | <b>0.058</b>  | <b>O<sub>36</sub></b> | <b>0.291</b>  | <b>0.498</b>  | <b>0.057</b>  |
| <b>O<sub>37</sub></b> | <b>0.306</b>  | <b>0.466</b>  | <b>0.098</b>  | <b>O<sub>37</sub></b> | <b>0.290</b>  | <b>0.498</b>  | <b>0.097</b>  |



|                       |               |               |              |                       |               |               |              |
|-----------------------|---------------|---------------|--------------|-----------------------|---------------|---------------|--------------|
| <b>O<sub>38</sub></b> | <b>0.306</b>  | <b>0.466</b>  | <b>0.139</b> | <b>O<sub>38</sub></b> | <b>0.288</b>  | <b>0.498</b>  | <b>0.137</b> |
| <b>O<sub>39</sub></b> | <b>0.306</b>  | <b>0.466</b>  | <b>0.179</b> | <b>O<sub>39</sub></b> | <b>0.282</b>  | <b>0.498</b>  | <b>0.177</b> |
| <b>O<sub>40</sub></b> | <b>0.802</b>  | <b>-0.034</b> | <b>0.018</b> | <b>O<sub>40</sub></b> | <b>0.787</b>  | <b>-0.001</b> | <b>0.016</b> |
| <b>O<sub>41</sub></b> | <b>0.807</b>  | <b>-0.034</b> | <b>0.058</b> | <b>O<sub>41</sub></b> | <b>0.791</b>  | <b>-0.001</b> | <b>0.057</b> |
| <b>O<sub>42</sub></b> | <b>0.807</b>  | <b>-0.034</b> | <b>0.099</b> | <b>O<sub>42</sub></b> | <b>0.791</b>  | <b>-0.001</b> | <b>0.097</b> |
| <b>O<sub>43</sub></b> | <b>0.807</b>  | <b>-0.034</b> | <b>0.137</b> | <b>O<sub>43</sub></b> | <b>0.791</b>  | <b>-0.001</b> | <b>0.138</b> |
| <b>O<sub>44</sub></b> | <b>0.804</b>  | <b>-0.037</b> | <b>0.180</b> | <b>O<sub>44</sub></b> | <b>0.787</b>  | <b>0.000</b>  | <b>0.178</b> |
| <b>Pb<sub>1</sub></b> | <b>0.997</b>  | <b>0.018</b>  | <b>0.275</b> | <b>Pb<sub>1</sub></b> | <b>0.054</b>  | <b>-0.006</b> | <b>0.269</b> |
| <b>Pb<sub>2</sub></b> | <b>0.003</b>  | <b>0.992</b>  | <b>0.350</b> | <b>Pb<sub>2</sub></b> | <b>0.023</b>  | <b>-0.012</b> | <b>0.346</b> |
| <b>Pb<sub>3</sub></b> | <b>-0.021</b> | <b>0.971</b>  | <b>0.427</b> | <b>Pb<sub>3</sub></b> | <b>0.012</b>  | <b>-0.014</b> | <b>0.425</b> |
| <b>I<sub>1</sub></b>  | <b>0.473</b>  | <b>0.038</b>  | <b>0.276</b> | <b>I<sub>1</sub></b>  | <b>0.568</b>  | <b>-0.011</b> | <b>0.270</b> |
| <b>I<sub>2</sub></b>  | <b>0.475</b>  | <b>0.959</b>  | <b>0.350</b> | <b>I<sub>2</sub></b>  | <b>0.530</b>  | <b>-0.011</b> | <b>0.347</b> |
| <b>I<sub>3</sub></b>  | <b>0.467</b>  | <b>0.972</b>  | <b>0.421</b> | <b>I<sub>3</sub></b>  | <b>0.515</b>  | <b>-0.020</b> | <b>0.423</b> |
| <b>I<sub>4</sub></b>  | <b>0.950</b>  | <b>0.539</b>  | <b>0.275</b> | <b>I<sub>4</sub></b>  | <b>0.052</b>  | <b>0.491</b>  | <b>0.273</b> |
| <b>I<sub>5</sub></b>  | <b>0.951</b>  | <b>0.499</b>  | <b>0.349</b> | <b>I<sub>5</sub></b>  | <b>0.002</b>  | <b>0.489</b>  | <b>0.349</b> |
| <b>I<sub>6</sub></b>  | <b>0.949</b>  | <b>0.481</b>  | <b>0.424</b> | <b>I<sub>6</sub></b>  | <b>-0.022</b> | <b>0.487</b>  | <b>0.423</b> |
| <b>I<sub>7</sub></b>  | <b>0.002</b>  | <b>0.042</b>  | <b>0.234</b> | <b>I<sub>7</sub></b>  | <b>0.147</b>  | <b>-0.007</b> | <b>0.233</b> |
| <b>I<sub>8</sub></b>  | <b>-0.046</b> | <b>0.057</b>  | <b>0.312</b> | <b>I<sub>8</sub></b>  | <b>0.066</b>  | <b>-0.010</b> | <b>0.310</b> |
| <b>I<sub>9</sub></b>  | <b>-0.041</b> | <b>0.013</b>  | <b>0.388</b> | <b>I<sub>9</sub></b>  | <b>0.051</b>  | <b>-0.011</b> | <b>0.387</b> |
| <b>I<sub>10</sub></b> | <b>-0.016</b> | <b>0.920</b>  | <b>0.465</b> | <b>I<sub>10</sub></b> | <b>0.068</b>  | <b>-0.012</b> | <b>0.464</b> |
| <b>C<sub>1</sub></b>  | <b>0.460</b>  | <b>0.587</b>  | <b>0.241</b> | <b>C<sub>1</sub></b>  | <b>0.686</b>  | <b>0.488</b>  | <b>0.234</b> |
| <b>C<sub>2</sub></b>  | <b>0.439</b>  | <b>0.487</b>  | <b>0.312</b> | <b>C<sub>2</sub></b>  | <b>0.553</b>  | <b>0.488</b>  | <b>0.307</b> |
| <b>C<sub>3</sub></b>  | <b>0.441</b>  | <b>0.454</b>  | <b>0.386</b> | <b>C<sub>3</sub></b>  | <b>0.551</b>  | <b>0.486</b>  | <b>0.382</b> |
| <b>C<sub>4</sub></b>  | <b>0.467</b>  | <b>0.437</b>  | <b>0.458</b> | <b>C<sub>4</sub></b>  | <b>0.527</b>  | <b>0.485</b>  | <b>0.458</b> |
| <b>N<sub>1</sub></b>  | <b>0.501</b>  | <b>0.793</b>  | <b>0.234</b> | <b>N<sub>1</sub></b>  | <b>0.526</b>  | <b>0.488</b>  | <b>0.247</b> |
| <b>N<sub>2</sub></b>  | <b>0.645</b>  | <b>0.589</b>  | <b>0.312</b> | <b>N<sub>2</sub></b>  | <b>0.465</b>  | <b>0.488</b>  | <b>0.324</b> |

|                       |              |              |              |                       |              |              |              |
|-----------------------|--------------|--------------|--------------|-----------------------|--------------|--------------|--------------|
| <b>N<sub>3</sub></b>  | <b>0.650</b> | <b>0.548</b> | <b>0.386</b> | <b>N<sub>3</sub></b>  | <b>0.442</b> | <b>0.488</b> | <b>0.398</b> |
| <b>N<sub>4</sub></b>  | <b>0.480</b> | <b>0.665</b> | <b>0.456</b> | <b>N<sub>4</sub></b>  | <b>0.297</b> | <b>0.488</b> | <b>0.457</b> |
| <b>H<sub>1</sub></b>  | <b>0.644</b> | <b>0.849</b> | <b>0.238</b> | <b>H<sub>1</sub></b>  | <b>0.379</b> | <b>0.490</b> | <b>0.242</b> |
| <b>H<sub>2</sub></b>  | <b>0.736</b> | <b>0.544</b> | <b>0.321</b> | <b>H<sub>2</sub></b>  | <b>0.305</b> | <b>0.488</b> | <b>0.324</b> |
| <b>H<sub>3</sub></b>  | <b>0.733</b> | <b>0.501</b> | <b>0.396</b> | <b>H<sub>3</sub></b>  | <b>0.284</b> | <b>0.483</b> | <b>0.396</b> |
| <b>H<sub>4</sub></b>  | <b>0.614</b> | <b>0.725</b> | <b>0.461</b> | <b>H<sub>4</sub></b>  | <b>0.243</b> | <b>0.488</b> | <b>0.446</b> |
| <b>H<sub>5</sub></b>  | <b>0.391</b> | <b>0.897</b> | <b>0.238</b> | <b>H<sub>5</sub></b>  | <b>0.541</b> | <b>0.617</b> | <b>0.254</b> |
| <b>H<sub>6</sub></b>  | <b>0.635</b> | <b>0.748</b> | <b>0.312</b> | <b>H<sub>6</sub></b>  | <b>0.509</b> | <b>0.617</b> | <b>0.330</b> |
| <b>H<sub>7</sub></b>  | <b>0.645</b> | <b>0.708</b> | <b>0.387</b> | <b>H<sub>7</sub></b>  | <b>0.478</b> | <b>0.613</b> | <b>0.405</b> |
| <b>H<sub>8</sub></b>  | <b>0.352</b> | <b>0.737</b> | <b>0.461</b> | <b>H<sub>8</sub></b>  | <b>0.235</b> | <b>0.620</b> | <b>0.463</b> |
| <b>H<sub>9</sub></b>  | <b>0.504</b> | <b>0.787</b> | <b>0.221</b> | <b>H<sub>9</sub></b>  | <b>0.538</b> | <b>0.358</b> | <b>0.254</b> |
| <b>H<sub>10</sub></b> | <b>0.725</b> | <b>0.555</b> | <b>0.301</b> | <b>H<sub>10</sub></b> | <b>0.509</b> | <b>0.359</b> | <b>0.330</b> |
| <b>H<sub>11</sub></b> | <b>0.736</b> | <b>0.512</b> | <b>0.376</b> | <b>H<sub>11</sub></b> | <b>0.479</b> | <b>0.354</b> | <b>0.404</b> |
| <b>H<sub>12</sub></b> | <b>0.481</b> | <b>0.715</b> | <b>0.444</b> | <b>H<sub>12</sub></b> | <b>0.233</b> | <b>0.355</b> | <b>0.463</b> |
| <b>H<sub>15</sub></b> | <b>0.360</b> | <b>0.510</b> | <b>0.375</b> | <b>H<sub>15</sub></b> | <b>0.505</b> | <b>0.625</b> | <b>0.375</b> |
| <b>H<sub>16</sub></b> | <b>0.325</b> | <b>0.384</b> | <b>0.452</b> | <b>H<sub>16</sub></b> | <b>0.586</b> | <b>0.624</b> | <b>0.452</b> |
| <b>H<sub>17</sub></b> | <b>0.455</b> | <b>0.596</b> | <b>0.255</b> | <b>H<sub>17</sub></b> | <b>0.664</b> | <b>0.350</b> | <b>0.226</b> |
| <b>H<sub>18</sub></b> | <b>0.365</b> | <b>0.528</b> | <b>0.324</b> | <b>H<sub>18</sub></b> | <b>0.501</b> | <b>0.350</b> | <b>0.301</b> |
| <b>H<sub>19</sub></b> | <b>0.356</b> | <b>0.497</b> | <b>0.397</b> | <b>H<sub>19</sub></b> | <b>0.507</b> | <b>0.348</b> | <b>0.375</b> |
| <b>H<sub>20</sub></b> | <b>0.466</b> | <b>0.394</b> | <b>0.471</b> | <b>H<sub>20</sub></b> | <b>0.583</b> | <b>0.349</b> | <b>0.452</b> |
| <b>H<sub>21</sub></b> | <b>0.585</b> | <b>0.480</b> | <b>0.238</b> | <b>H<sub>21</sub></b> | <b>0.838</b> | <b>0.480</b> | <b>0.239</b> |
| <b>H<sub>22</sub></b> | <b>0.461</b> | <b>0.320</b> | <b>0.311</b> | <b>H<sub>22</sub></b> | <b>0.721</b> | <b>0.489</b> | <b>0.308</b> |
| <b>H<sub>23</sub></b> | <b>0.455</b> | <b>0.285</b> | <b>0.385</b> | <b>H<sub>23</sub></b> | <b>0.717</b> | <b>0.487</b> | <b>0.384</b> |
| <b>H<sub>24</sub></b> | <b>0.600</b> | <b>0.375</b> | <b>0.455</b> | <b>H<sub>24</sub></b> | <b>0.572</b> | <b>0.482</b> | <b>0.469</b> |

**Table S3.**The interface model parameters of SnO<sub>2</sub> (TiO<sub>2</sub>)/MAPbI<sub>3</sub> heterojunction.

| Optimized heterojunction interface models | Atomic bond | Atomic bond length (Å) | Interface binding energy (eV/nm <sup>2</sup> ) |
|-------------------------------------------|-------------|------------------------|------------------------------------------------|
| TiO <sub>2</sub> /MAPbI <sub>3</sub>      | Pb-O        | 2.80                   | -6.75                                          |
|                                           | I-Ti        | 2.90                   |                                                |
| SnO <sub>2</sub> /MAPbI <sub>3</sub>      | Pb-O        | 1.78                   | -1.02                                          |
|                                           | I-Sn        | 1.89                   |                                                |

**Table S4.**The binding energy of SnO<sub>2</sub> (TiO<sub>2</sub>)/MAPbI<sub>3</sub> heterojunction interfaces system under ambient conditions.

| Heterojunction interfaces            | E(eV)    | E <sub>MAPbI<sub>3</sub></sub> (eV) | E <sub>SnO<sub>2</sub> (TiO<sub>2</sub>)</sub> (eV) | ΔE(eV) | ΔE <sub>unit</sub> (eV/nm <sup>2</sup> ) |
|--------------------------------------|----------|-------------------------------------|-----------------------------------------------------|--------|------------------------------------------|
| SnO <sub>2</sub> /MAPbI <sub>3</sub> | -1044.88 | -330.25                             | -715.52                                             | -0.89  | -1.02                                    |
| TiO <sub>2</sub> /MAPbI <sub>3</sub> | -976.38  | -330.05                             | -652.20                                             | -5.87  | -6.75                                    |

**Table S5.**The interface binding energy of SnO<sub>2</sub> (TiO<sub>2</sub>)/MAPbI<sub>3</sub> heterojunction up to 20 GPa.

| Pressure (GPa) | Heterojunction interface models      | Interface binding energy (eV/nm <sup>2</sup> ) |
|----------------|--------------------------------------|------------------------------------------------|
| 0 GPa          | TiO <sub>2</sub> /MAPbI <sub>3</sub> | -6.75                                          |
|                | SnO <sub>2</sub> /MAPbI <sub>3</sub> | -1.02                                          |
| 5 GPa          | TiO <sub>2</sub> /MAPbI <sub>3</sub> | -6.61                                          |
|                | SnO <sub>2</sub> /MAPbI <sub>3</sub> | -0.92                                          |
| 10 GPa         | TiO <sub>2</sub> /MAPbI <sub>3</sub> | -6.41                                          |
|                | SnO <sub>2</sub> /MAPbI <sub>3</sub> | -0.84                                          |
| 15 GPa         | TiO <sub>2</sub> /MAPbI <sub>3</sub> | -6.15                                          |
|                | SnO <sub>2</sub> /MAPbI <sub>3</sub> | -0.77                                          |
| 20 GPa         | TiO <sub>2</sub> /MAPbI <sub>3</sub> | -5.85                                          |
|                | SnO <sub>2</sub> /MAPbI <sub>3</sub> | -0.72                                          |

**Table S6.** The charge transport driving force of SnO<sub>2</sub> (TiO<sub>2</sub>)/MAPbI<sub>3</sub> heterojunction interfaces up to 20 GPa.

| Heterojunction interfaces            | E <sub>d</sub> (eV) | ΔE <sub>d</sub> (eV) | Pressure(GPa) |
|--------------------------------------|---------------------|----------------------|---------------|
| TiO <sub>2</sub> /MAPbI <sub>3</sub> | 0.75                | 0.70                 | 0             |
| SnO <sub>2</sub> /MAPbI <sub>3</sub> | 1.45                |                      |               |
| TiO <sub>2</sub> /MAPbI <sub>3</sub> | 0.82                | 0.84                 | 5             |
| SnO <sub>2</sub> /MAPbI <sub>3</sub> | 1.66                |                      |               |
| TiO <sub>2</sub> /MAPbI <sub>3</sub> | 0.94                | 0.99                 | 10            |
| SnO <sub>2</sub> /MAPbI <sub>3</sub> | 1.93                |                      |               |
| TiO <sub>2</sub> /MAPbI <sub>3</sub> | 1.09                | 1.25                 | 15            |
| SnO <sub>2</sub> /MAPbI <sub>3</sub> | 2.34                |                      |               |
| TiO <sub>2</sub> /MAPbI <sub>3</sub> | 1.26                | 1.62                 | 20            |
| SnO <sub>2</sub> /MAPbI <sub>3</sub> | 2.88                |                      |               |

**Table S7.** Binding energy (BE) of the SnO<sub>2</sub>/MAPbI<sub>3</sub> and TiO<sub>2</sub>/MAPbI<sub>3</sub> interfaces on MA orientation [001] [011] and [111] under ambient conditions.

| MA orientation | Interface binding energy (eV/nm <sup>2</sup> ) |                               |                                      |                               |
|----------------|------------------------------------------------|-------------------------------|--------------------------------------|-------------------------------|
|                | SnO <sub>2</sub> /MAPbI <sub>3</sub>           |                               | TiO <sub>2</sub> /MAPbI <sub>3</sub> |                               |
|                | MAI-termination                                | PbI <sub>2</sub> -termination | MAI-termination                      | PbI <sub>2</sub> -termination |
| [001]          | 0.84                                           | 2.98                          | 0.86                                 | 2.36                          |
| [011]          | 0.86                                           | 2.84                          | 0.94                                 | 2.42                          |
| [111]          | 1.51                                           | 2.72                          | 1.22                                 | 2.32                          |

**Table S8.** Binding energy (BE) of the SnO<sub>2</sub>/MAPbI<sub>3</sub> and TiO<sub>2</sub>/MAPbI<sub>3</sub> interfaces on MA orientation [001] [011] and [111] at 5 GPa.

| MA orientation | Interface binding energy (eV/nm <sup>2</sup> ) |                               |                                      |                               |
|----------------|------------------------------------------------|-------------------------------|--------------------------------------|-------------------------------|
|                | SnO <sub>2</sub> /MAPbI <sub>3</sub>           |                               | TiO <sub>2</sub> /MAPbI <sub>3</sub> |                               |
|                | MAI-termination                                | PbI <sub>2</sub> -termination | MAI-termination                      | PbI <sub>2</sub> -termination |

|       |      |      |      |      |
|-------|------|------|------|------|
| [001] | 0.92 | 3.12 | 0.97 | 3.34 |
| [011] | 0.94 | 3.44 | 1.02 | 3.02 |
| [111] | 1.71 | 3.32 | 1.40 | 2.94 |

**Table S9.** Binding energy (BE) of the SnO<sub>2</sub>/MAPbI<sub>3</sub> and TiO<sub>2</sub>/MAPbI<sub>3</sub> interfaces on MA orientation [001] [011] and [111] at 10 GPa.

| MA orientation | Interface binding energy (eV/nm <sup>2</sup> ) |                               |                                      |                               |
|----------------|------------------------------------------------|-------------------------------|--------------------------------------|-------------------------------|
|                | SnO <sub>2</sub> /MAPbI <sub>3</sub>           |                               | TiO <sub>2</sub> /MAPbI <sub>3</sub> |                               |
|                | MAI-termination                                | PbI <sub>2</sub> -termination | MAI-termination                      | PbI <sub>2</sub> -termination |
| [001]          | 1.24                                           | 3.25                          | 1.27                                 | 3.42                          |
| [011]          | 1.27                                           | 3.78                          | 1.34                                 | 3.36                          |
| [111]          | 1.95                                           | 3.79                          | 1.61                                 | 3.49                          |

**Table S10.** Binding energy (BE) of the SnO<sub>2</sub>/MAPbI<sub>3</sub> and TiO<sub>2</sub>/MAPbI<sub>3</sub> interfaces on MA orientation [001] [011] and [111] at 15 GPa.

| MA orientation | Interface binding energy (eV/nm <sup>2</sup> ) |                               |                                      |                               |
|----------------|------------------------------------------------|-------------------------------|--------------------------------------|-------------------------------|
|                | SnO <sub>2</sub> /MAPbI <sub>3</sub>           |                               | TiO <sub>2</sub> /MAPbI <sub>3</sub> |                               |
|                | MAI-termination                                | PbI <sub>2</sub> -termination | MAI-termination                      | PbI <sub>2</sub> -termination |
| [001]          | 1.47                                           | 3.45                          | 1.52                                 | 3.64                          |
| [011]          | 1.52                                           | 3.94                          | 1.61                                 | 3.54                          |
| [111]          | 2.08                                           | 3.99                          | 1.74                                 | 3.69                          |

Supplementary Figures

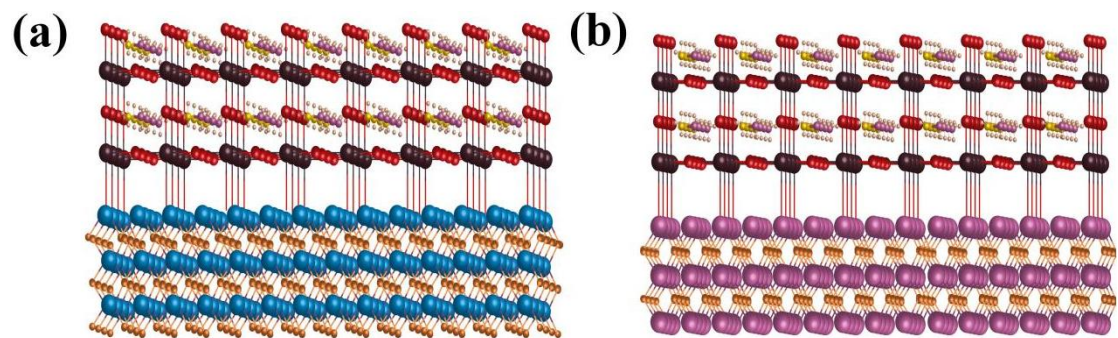

Fig. S1 Initial geometry of TiO<sub>2</sub>/MAPbI<sub>3</sub> and SnO<sub>2</sub>/MAPbI<sub>3</sub> heterojunction interfaces.

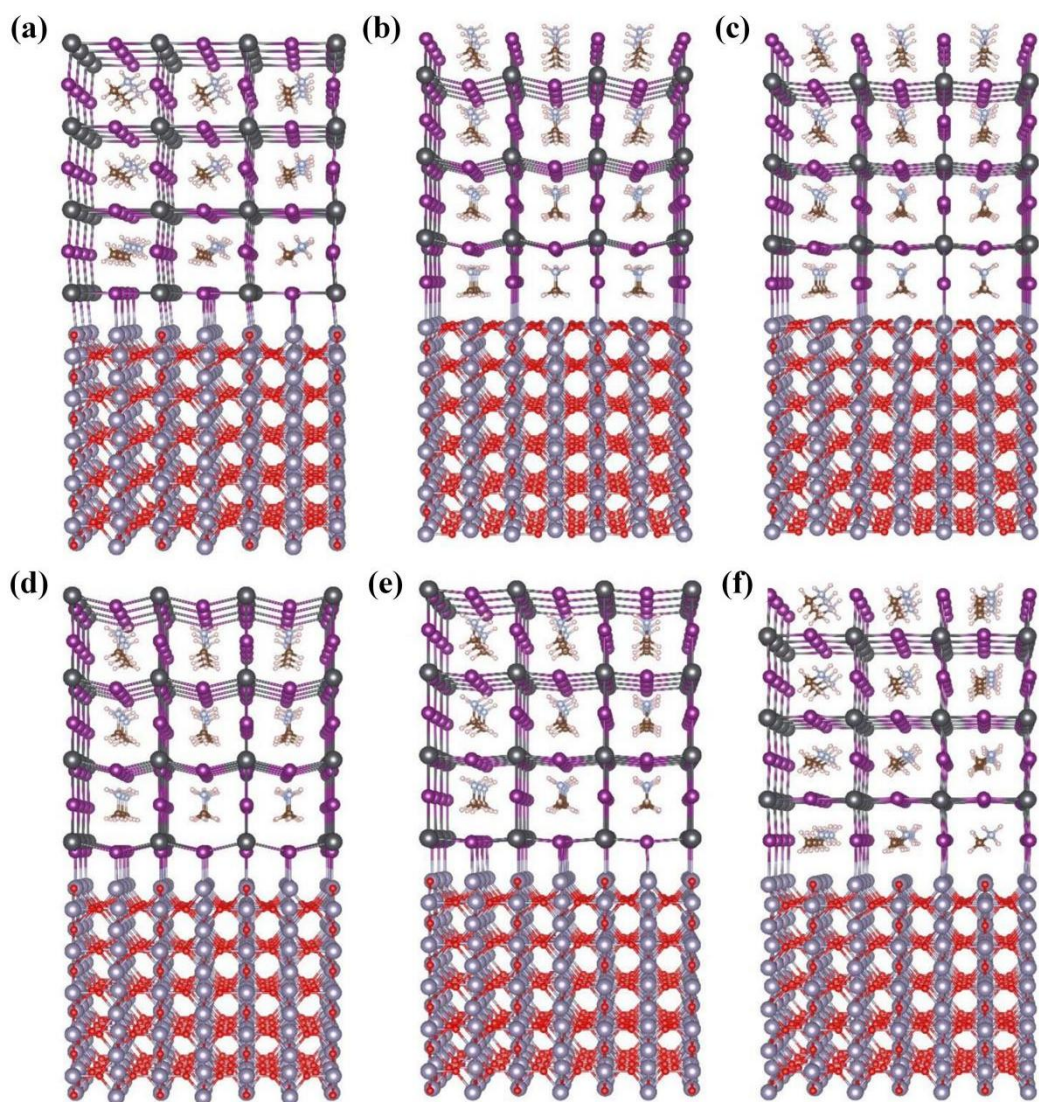

Fig. S2 Initial geometry of SnO<sub>2</sub> (TiO<sub>2</sub>)/MAPbI<sub>3</sub> interfaces of (a-c) MAI-termination with (a) [001], (b) [011], and (c) [111] direction of MA and at (d-f) PbI<sub>2</sub>-termination with (d) [001], (e) [011], and (f) [111] direction of MA. [Pb (black), I (purple), C (brown) N (light blue), H (white), Sn (dark blue), and O (red)].



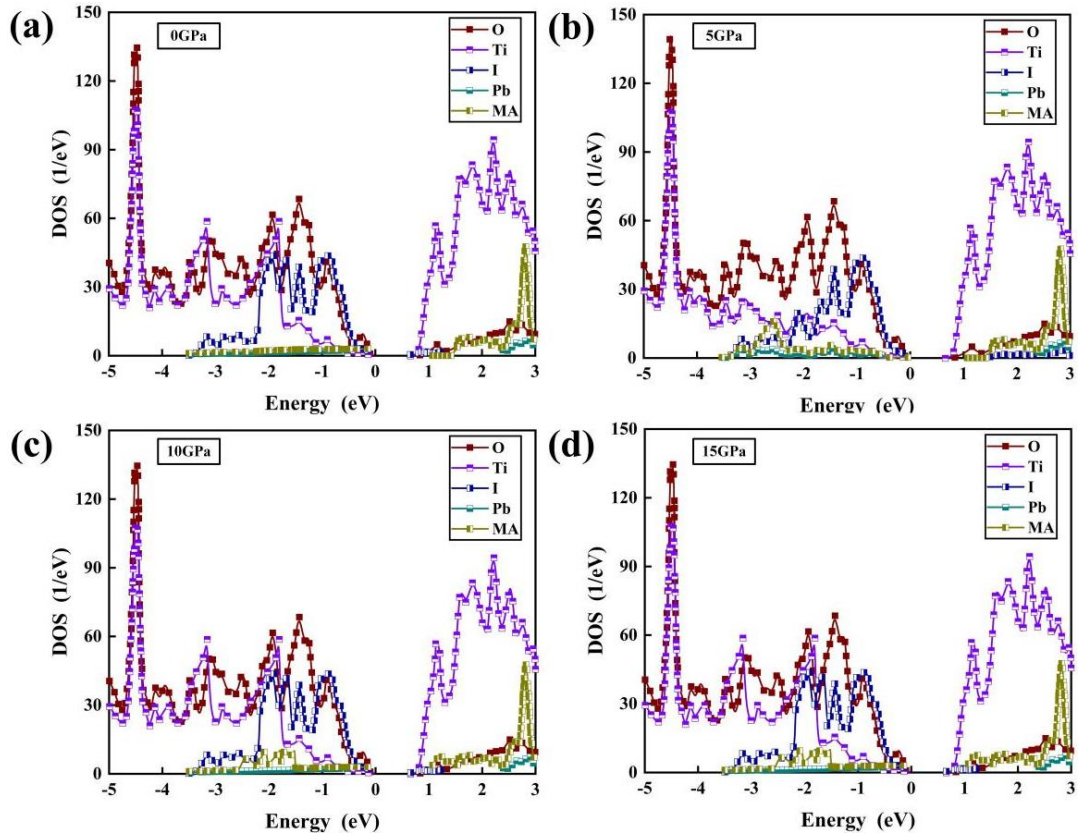

**Fig. S3** PDOS of MA, Pb, I, Ti, O at (a) 0 GPa, (b) 5 GPa, (c) 10 GPa, (d) 15 GPa.

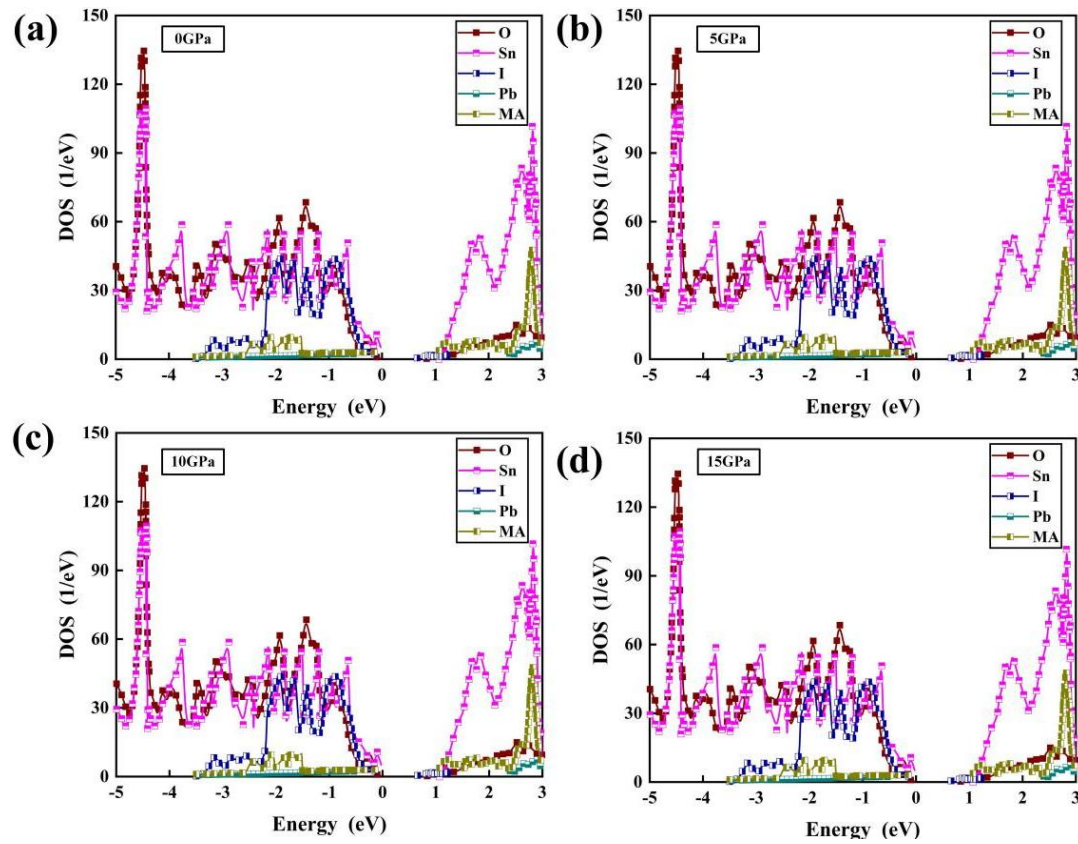

**Fig. S4** PDOS of MA, Pb, I, Sn, O at (a) 0 GPa, (b) 5 GPa, (c) 10 GPa, (d) 15 GPa.
